# Supplementary figures and images for: The eightfold path to non-enzymatic RNA replication
Source: Springer Nature journal article supplement (doi:10.1186/1759-2208-3-2), 2012-02-03

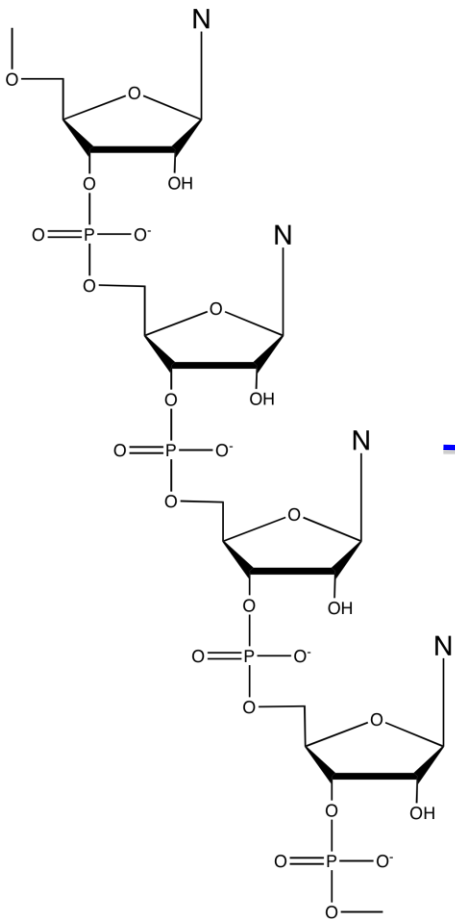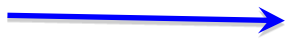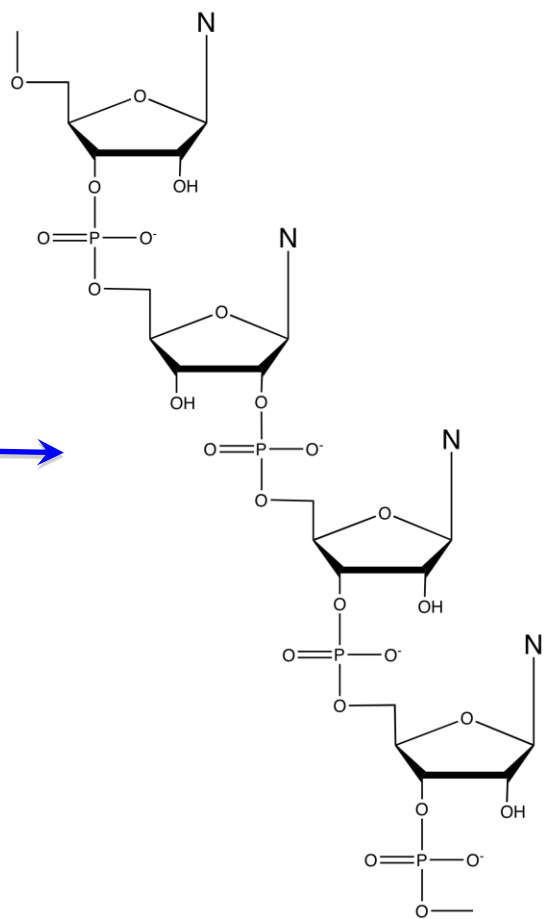

Supplement: 13322_2011_18_MOESM1_ESM.pdf [file 13322_2011_18_MOESM1_ESM.pdf]

a.

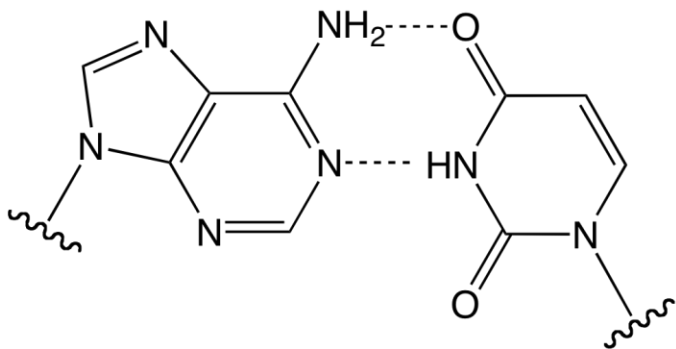

b.

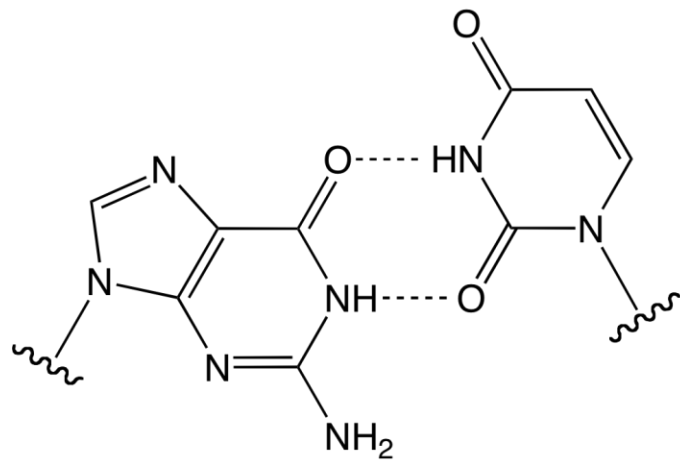

c.

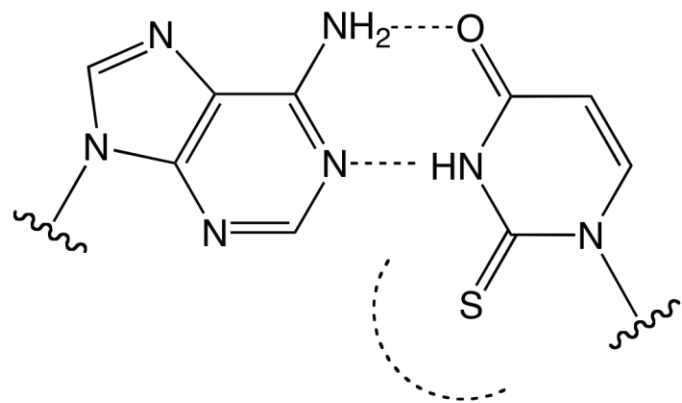

d.

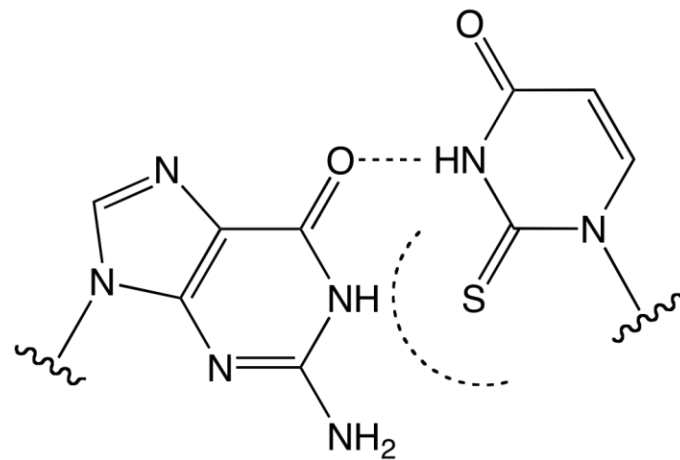

Supplement: 13322_2011_18_MOESM2_ESM.pdf [file 13322_2011_18_MOESM2_ESM.pdf]

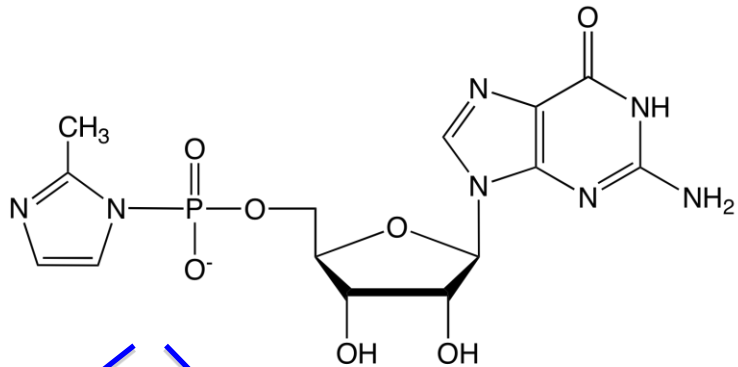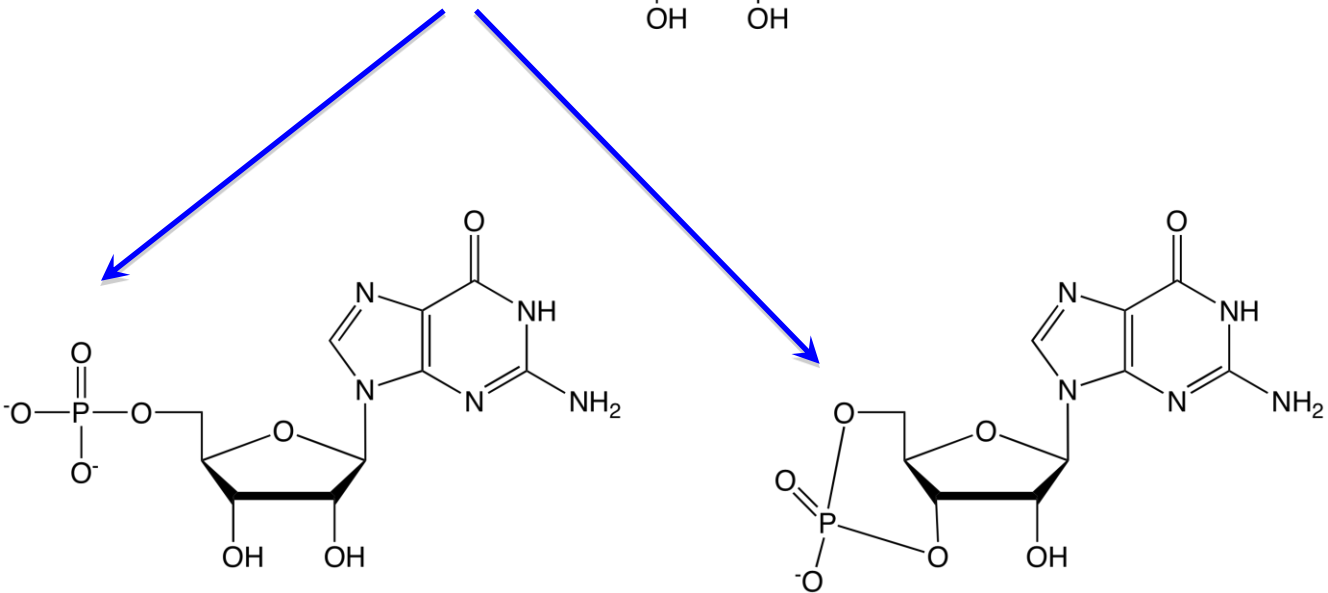

Supplement: 13322_2011_18_MOESM3_ESM.pdf [file 13322_2011_18_MOESM3_ESM.pdf]

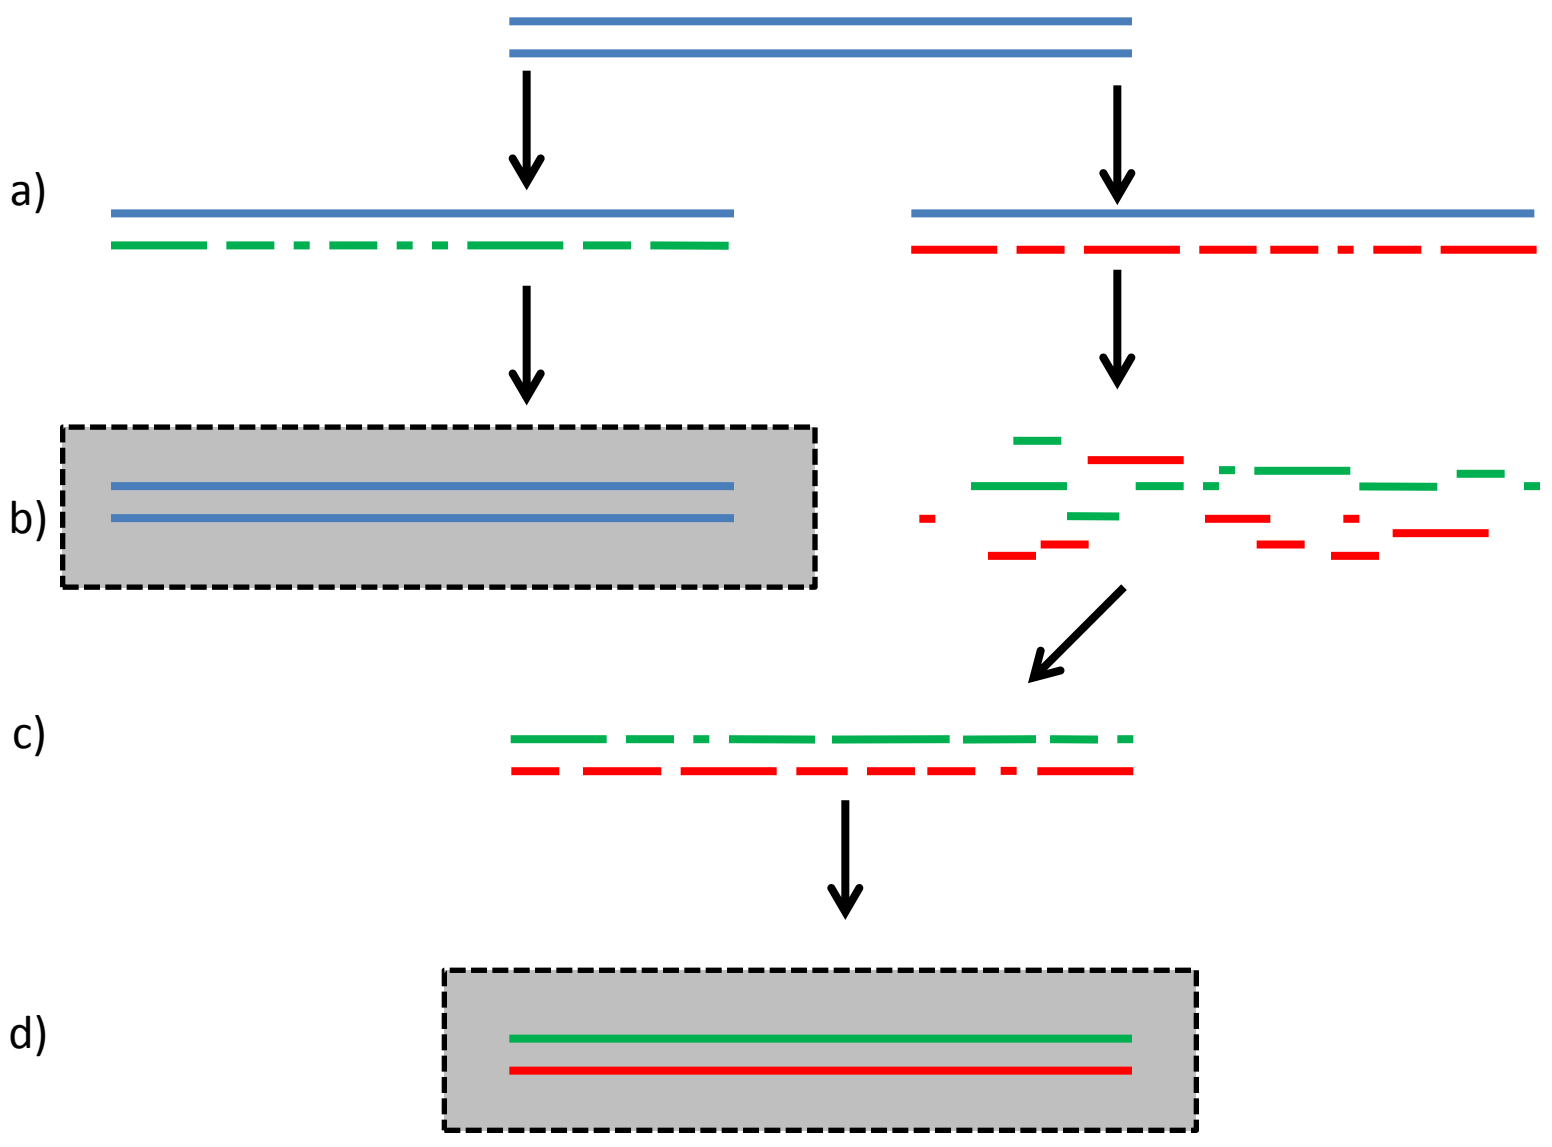

Supplement: 13322_2011_18_MOESM5_ESM.pdf [file 13322_2011_18_MOESM5_ESM.pdf]
